# Supplementary material
Source: Springer Nature journal article supplement (https://www.springermedizin.de/resource/supplementary/12876_2012_866_MOESM1_ESM.pdf/9437506)
Supplement: MOESM1 [file 9437506]

PedsQL™ EoE Module draft developed from 42 Focus Interviews

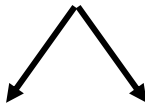

Cognitive Interviews: Child  
17 new participants  
Ages 5-7, 8-12, 13-18

Cognitive Interviews: Parent  
27 new participants  
Ages 2-4, 5-7, 8-12, 13-18

Research team reviewed responses from 44 Cognitive Interviews

PedsQL™ EoE Module content validated
